# Supplementary material for: Thiourea isosteres as anion receptors and transmembrane transporters
Source: Royal Society of Chemistry journal article supplement (doi:10.1039/c1cc12439k), 2011-01-01
Supplement: c1cc12439k.pdf [file c1cc12439k.pdf]

# Thiourea isosteres as anion receptors and transmembrane transporters†

## Electronic supplementary information

Marco Wenzel,<sup>a</sup> Mark E. Light<sup>a</sup> Anthony P. Davis<sup>b</sup> and Philip A. Gale<sup>\*a</sup>

### General remarks

<sup>1</sup>H NMR (300 MHz) and <sup>13</sup>C{<sup>1</sup>H} NMR (75 MHz) were determined on a Bruker AV300 spectrometer. Chemical shifts for <sup>1</sup>H NMR are reported in parts per million (ppm), calibrated to the solvent peak set. The following abbreviations are used for spin multiplicity: s = singlet, d = doublet, t = triplet, m = multiplet. Chemical shifts for <sup>13</sup>C{<sup>1</sup>H} NMR are reported in ppm, relative to the central line of a septet at  $\delta = 39.52$  ppm for DMSO-*d*<sub>6</sub>. HR-MS(ES) spectra were recorded using a Bruker Apex III spectrometer and reported as *m/z* (relative intensity).

All solvents and starting materials were purchased from commercial sources and used without further purification unless otherwise stated. Dry dichloromethane was obtained by distillation over CaH<sub>2</sub> prior to use. POPC was supplied by Genzyme. NMR titrations were performed by addition of aliquots of the putative anionic guest as the tetrabutylammonium (TBA) salt (0.15 M), in a solution of the receptor (0.01 M) in DMSO-*d*<sub>6</sub> to 0.01 M solution of the receptor.

Chloride concentrations during transport experiments were determined using an Accumet chloride selective electrode.

### Synthesis:

The thiourea intermediates **4** and **5** were prepared according to a literature method<sup>1</sup> by adding 1-hexylamine (5 mM, 0.7 mL, in 10 mL dry DCM) dropwise over an hour to one equivalent of the related isothiocyanate (phenyl-isothiocyanate) 0.6 mL, 5 mM and pentafluorophenyl isothiocyanate (0.7 mL, 0.5 mM), respectively) in dry 15 ml dry DCM at room temperature. The reaction mixture was stirred over night, quenched with 10 ml water and washed with 1 M HCl (2 x 10 mL) and 1 M NaOH (2 x 10 mL). The organic layer was dried over MgSO<sub>4</sub>, filtered and crude product was isolated after evaporation of the solvent under reduced pressure.

The cyanoguanidine receptors **1** and **2** were prepared following the method described by Novak *et al.*<sup>2</sup> by reacting the thiourea with an excess of MeI in acetone at room temperature under N<sub>2</sub>-atmosphere over night. The excess of MeI was removed under reduced pressure. The crude product was treated without purification with cyanoamine (3 time excess) in the presence of 15% 1,4-diazabicyclo[2.2.2]octane (DABCO) in 15 mL butanol. The reaction mixture was refluxed over night under N<sub>2</sub>. The solvent was removed under reduced pressure. The residue was taken up in 15 mL water, extracted with dichloromethane (3 x 7 mL), dried over MgSO<sub>4</sub> and the solvent was removed to give the crude product.

### Compound 1

Recrystallised from DCM/Et<sub>2</sub>O, plattlet crystals filtered off, washed with Et<sub>2</sub>O and dired on air; yield: 85.2 %, HR-MS m/z 267.1570 [M+Na]<sup>+</sup>, calc. C<sub>14</sub>H<sub>20</sub>N<sub>4</sub>Na = 267.1586; <sup>1</sup>H NMR in CDCl<sub>3</sub> δ [ppm], 7.70 (1, s, NH), 7.45 (2, t, C<sub>6</sub>H<sub>5</sub>), 7.34 (1, t, C<sub>6</sub>H<sub>5</sub>), 7.26 (2, d, C<sub>6</sub>H<sub>5</sub>), 4.94 (1, s, NH), 3.27 (2, m, CH<sub>2</sub>), 1.51 (2, t, CH<sub>2</sub>), 1.28 (6, s, (CH<sub>2</sub>)<sub>3</sub>) and 0.89 (3, t, CH<sub>3</sub>); <sup>13</sup>C 158.8, 135.5, 130.1, 127.4, 125.5, 118.1, 42.0, 31.3, 29.2, 26.3, 22.5, 13.9.

### Compound 2

Recrystallised from Et<sub>2</sub>O/hexane, washed with hexane and dired on air, yield 13.8 %, HR-MS m/z 335.1292 [M+H]<sup>+</sup>, calc. C<sub>14</sub>H<sub>16</sub>N<sub>4</sub>F<sub>5</sub> = 335.1295, 357.1111 [M+Na]<sup>+</sup>, calc. C<sub>14</sub>H<sub>15</sub>N<sub>4</sub>F<sub>5</sub>Na = 357.1115; <sup>1</sup>H NMR in DMSO-*d*<sub>6</sub> δ [ppm], 9.12 (1, s, NH), 7.49 (1, s, NH), 3.17 (2, d, CH<sub>2</sub>), 1.46 (2, s, CH<sub>2</sub>), 1.26 (6, s, (CH<sub>2</sub>)<sub>3</sub>) and 0.86 (3, t, CH<sub>3</sub>); <sup>13</sup>C 158.0, 145.4, 142.2, 139.0 136.6 116.5, 41.5, 30.8, 28.6, 25.6, 22.0, 13.8. Block cyrstalls grown by slow diffusion of hexane into Et<sub>2</sub>O solution.

### Compound 4

Yield: 99%; HR-MS m/z 259.1240 [M+Na]<sup>+</sup>, calc. C<sub>13</sub>H<sub>20</sub>N<sub>2</sub>SNa = 259.1251; <sup>1</sup>H NMR in DMSO-*d*<sub>6</sub> δ [ppm], 9.42 (1, s, NH), 7.71 (1, s, NH), 7.40 (2, d, C<sub>6</sub>H<sub>5</sub>), 7.30 (2, t, C<sub>6</sub>H<sub>5</sub>), 7.09 (1, t, C<sub>6</sub>H<sub>5</sub>), 3.45 (2, d, CH<sub>2</sub>), 1.53 (2, t, CH<sub>2</sub>), 1.28 (6, m, (CH<sub>2</sub>)<sub>3</sub>) and 0.87 (3, t, CH<sub>3</sub>); <sup>13</sup>C 180.2, 139.3, 128.5, 123.9, 122.9, 43.8, 31.9, 28.4, 26.1, 22.1, 13.9.

### Compound 5

Recrystallised from dichloroethane/hexane, crystals filtered off, washed with Et<sub>2</sub>O and dired on air; yield: 95.8 %, HR-MS m/z 349.0766 [M+Na]<sup>+</sup>, calc. C<sub>13</sub>H<sub>15</sub>F<sub>5</sub>N<sub>2</sub>SNa = 349.0780; <sup>1</sup>H NMR in DMSO-*d*<sub>6</sub> δ [ppm], 9.13 (1, s, NH), 8.16 (1, s, NH), 3.43 (2, q, CH<sub>2</sub>), 1.52 (2, t, CH<sub>2</sub>), 1.27 (6, s, (CH<sub>2</sub>)<sub>3</sub>) and 0.87 (3, t, CH<sub>3</sub>); <sup>13</sup>C 182.1, 145.2, 142.8, 138.4, 115.0, 44.7, 30.9, 28.2, 25.9, 22.0, 13.8.

### Compound 3

Compound **3** was prepared after the method described by Tullio et al.<sup>3,4</sup> The analytical data of the intermediate *3-(1 H-imidazol-1-yl)-4H-1,2,4-benzothiadiazine 1,1-dioxide* (**6**) are in agreement to reported data:<sup>4</sup> yield 81.9 %, ESI-MS (negative) m/z 247.1 [M-H]<sup>-</sup>, <sup>1</sup>H NMR in DMSO-*d*<sub>6</sub> δ [ppm] 9.30 (1, s, 2-H imidazole), 8.01 (1, s, 5-H imidazole), 7.74 (1, d, H phenol), 7.56 (2, m, H phenol ), 7.36 (2, M, H phenol + H imidazole).

Compound **6** (0.5 g, 2.0 mmol) and a 70 % w/v aqueous solution of 1-hexylamine (5 mL) was heated in a sealed vessel over night at 150 °C. After the mixture was cooled, the excess amine was eliminated by distillation under reduced pressure. The residue was taken up in EtOH and water was added. The white precipitate was collected by filtration, washed with water and Et<sub>2</sub>O, and dried in vacuum. Yield: 21.8 %. HR-MS  $m/z$  282.1272 [M+H]<sup>+</sup>, calc. C<sub>13</sub>H<sub>20</sub>N<sub>3</sub>O<sub>2</sub>S = 282.1286, 304.1087 [M+Na]<sup>+</sup>, calc. C<sub>13</sub>H<sub>20</sub>N<sub>3</sub>O<sub>2</sub>SNa = 304.1102; <sup>1</sup>H NMR in DMSO-*d*<sub>6</sub> δ [ppm] 10.49 (1, s, NH), 7.64 (1, d, C<sub>6</sub>H<sub>4</sub>), 7.54 (1, t, C<sub>6</sub>H<sub>4</sub>), 7.24 (1, t, C<sub>6</sub>H<sub>4</sub>), 7.20 (1, d, C<sub>6</sub>H<sub>4</sub>), 7.07 (1, s, NH), 3.21 (2, q, CH<sub>2</sub>), 1.51 (2, t, CH<sub>2</sub>), 1.28 (6, s, (CH<sub>2</sub>)<sub>3</sub>) and 0.88 (3, t, CH<sub>3</sub>); <sup>13</sup>C 151.1, 135.7, 132.3, 123.6, 122.8, 122.6, 116.4, 40.4, 30.9, 28.7, 25.9, 22.0, 13.9.

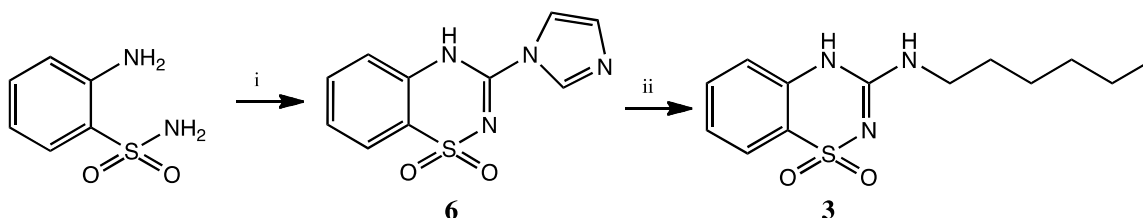

- i: Dioxane, 1,1'-Thiocarbonyldiimidazole, reflux, 6 h;  
ii: 1-hexylamine/H<sub>2</sub>O 70% v/v, 150°, 12 h, sealed vessel

## Crystallography

### Compound **4**

Crystalline needles of **4** were grown by slow evaporation from DCM, Data were collected on a Bruker Nonius APEXII mounted at the window of an FR591 rotating Mo anode with confocal optics. Crystal data for C<sub>13</sub>H<sub>20</sub>N<sub>2</sub>S, M = 236.37, orthorhombic, a = 8.5794(2) Å, b = 10.2955(2) Å, c = 15.2141(3) Å, V = 1343.85(5) Å<sup>3</sup>, T = 120 K, P2<sub>1</sub>2<sub>1</sub>2<sub>1</sub> (no. 19), Z = 4, 10 129 reflections measured, 3059 unique (R<sub>int</sub> = 0.0379) of which 3059 were used in the calculations, R<sub>1</sub> = 0.0345 (2871 with F > 2σ(F)). Absolute structure was determined by anomalous dispersion effects, the Flack parameter refined to 0.00(6).

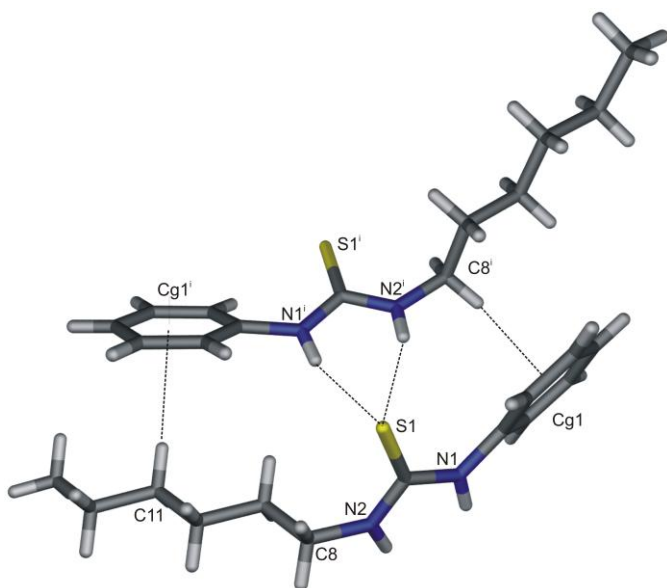

**Fig. S1** Schematic draw of the crystal structure of **4** with selected atoms labelled, dotted lines represent hydrogen bonds, Symmetry code:  $i = 1/2+x, 1/2-y, 2-z$ .

**Table S1** Hydrogen bonds in **1**, **2** and **4**.

| D-H      | A                   | D-H [Å] | H...A [Å] | D...A [Å]  | D-H...A [°] |
|----------|---------------------|---------|-----------|------------|-------------|
| <b>1</b> |                     |         |           |            |             |
| N1-H1    | N8 <sup>i</sup>     | 0.86    | 2.16      | 2.932(4)   | 149         |
| N2-H7    | N8 <sup>ii</sup>    | 0.86    | 2.35      | 3.122(3)   | 150         |
| N5-H15   | N4 <sup>iii</sup>   | 0.86    | 2.17      | 2.950(4)   | 150         |
| N6-H21   | N4 <sup>iv</sup>    | 0.86    | 2.42      | 3.127(3)   | 140         |
| <b>2</b> |                     |         |           |            |             |
| N1-H1    | N4 <sup>v</sup>     | 0.86    | 2.06      | 2.857(3)   | 153         |
| N2-H2    | N4 <sup>vi</sup>    | 0.86    | 2.26      | 3.013(3)   | 147         |
| <b>4</b> |                     |         |           |            |             |
| N1-H1    | S1 <sup>vii</sup>   | 0.86    | 2.54      | 3.3639(15) | 162         |
| N2-H2    | S1 <sup>vii</sup>   | 0.86    | 2.62      | 3.4376(15) | 160         |
| C8-H8B   | Cg1 <sup>vii</sup>  | 0.97    | 2.63      | 3.5078(18) | 151         |
| C11-H11B | Cg1 <sup>viii</sup> | 0.97    | 2.92      | 3.8595(18) | 163         |

Symmetry codes:  $i = 1+x, y, z$ ;  $ii = 1/2+x, 3/2-y, -z$ ;  $iii = -1+x, y, z$ ;  $iv = -1/2+x, 1/2-y, -z$ ;  $v = 2-x, 1-y, 1-z$ ;  $vi = 2-x, -1/2+y, 1/2-z$ ;  $vii = 1/2+x, 1/2-y, 2-z$ ;  $viii = -1/2+x, 1/2-y, 2-z$ .

## Anion Transport Studies

### Preparation of Vesicles

A lipid film of 1-palmitoyl-2-oleoyl-*sn*-glycero-3-phosphocholine (POPC) and cholesterol (0% or 30%) was formed from a chloroform solution under reduced pressure and dried under vacuum for at least 6 hours. The lipid film was rehydrated by vortexing

with a metal chloride (MCl) salt solution (489 mM MCl, 5 mM phosphate buffer at pH 7.2). The lipid suspension was then subjected to nine freeze-thaw cycles and allowed to age for 30 min at room temperature before extruding 25 times through a 200 nm polycarbonate membrane. The resulting unilamellar vesicles were dialyzed against the external medium to remove unencapsulated MCl salts.

### Chloride Transport Assays

Unilamellar POPC vesicles containing NaCl, prepared as described above, were suspended in 489 mM NaNO<sub>3</sub> solution buffered to pH 7.2 with sodium phosphate salts. The lipid concentration per sample was 1 mM. A DMSO solution of the carrier molecule (10 mM) was added to start the experiment and the chloride efflux was monitored using a chloride sensitive electrode. At 5 min, the vesicles were lysed with 50  $\mu$ l of polyoxyethylene(8)lauryl ether (0.232 mM in 7:1 water:DMSO *v/v*) and a total chloride reading was taken at 7 min.

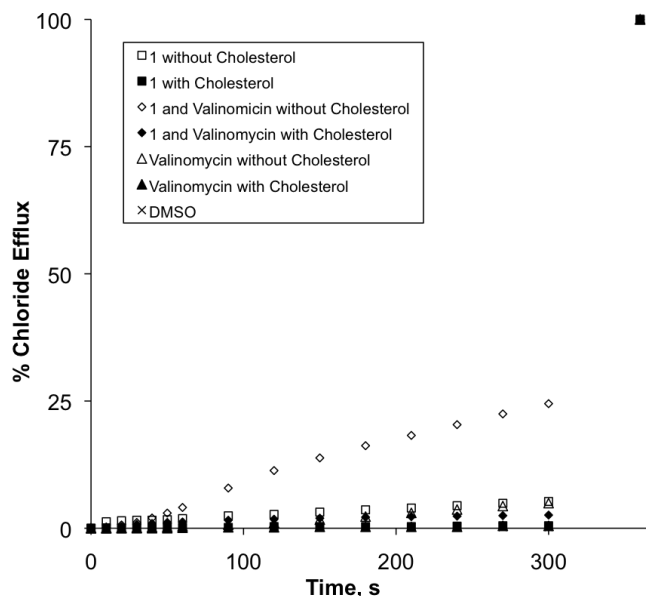

**Fig. S2** Chloride efflux promoted by 0.02 molar equiv. of receptor **1** in the presence and absence of valinomycin (0.02 molar equiv.) from unilamellar POPC vesicles and unilamellar POPC/cholesterol (7:3) vesicles, loaded with 489 mM KCl buffered to pH 7.2 with sodium phosphate salts. The vesicles were dispersed in 489 mM KNO<sub>3</sub> buffered to pH 7.2 with 5 mM sodium phosphate salts. Each point represents the average of three trials.

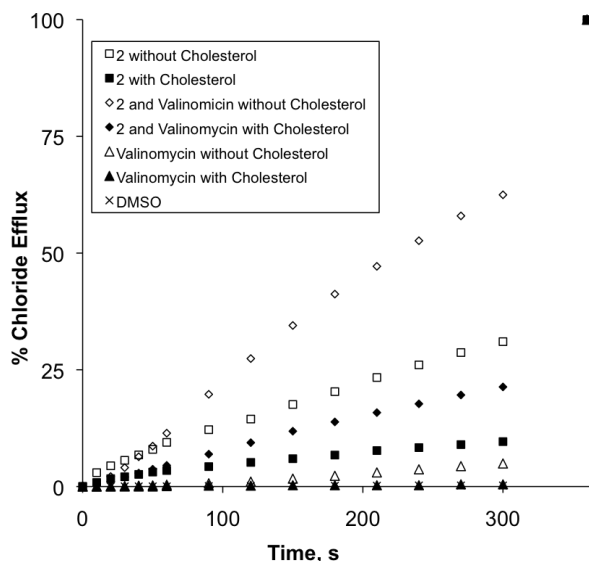

**Fig. S3** Chloride efflux promoted by 0.02 molar equiv. of receptor **2** in the presence and absence of valinomycin (0.02 molar equiv.) from unilamellar POPC vesicles and unilamellar POPC/cholesterol (7:3) vesicles, loaded with 489 mM KCl buffered to pH 7.2 with sodium phosphate salts. The vesicles were dispersed in 489 mM KNO<sub>3</sub> buffered to pH 7.2 with 5 mM sodium phosphate salts. Each point represents the average of three trials.

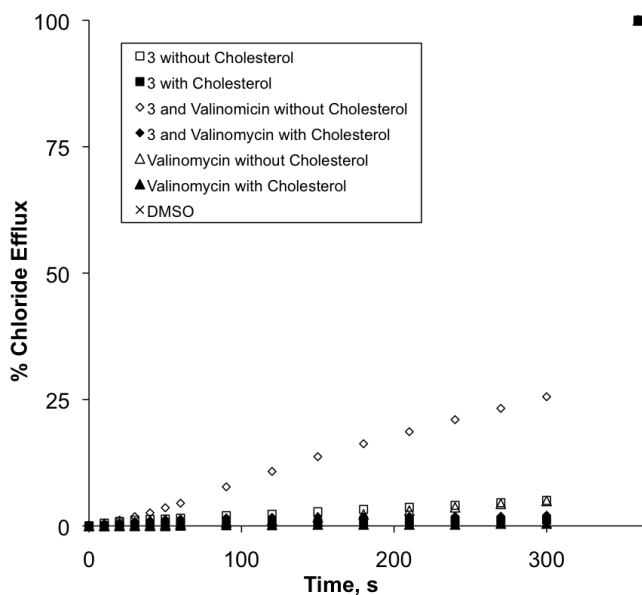

**Fig. S4** Chloride efflux promoted by 0.02 molar equiv. of receptor **3** in the presence and absence of valinomycin (0.02 molar equiv.) from unilamellar POPC vesicles and unilamellar POPC/cholesterol (7:3) vesicles, loaded with 489 mM KCl buffered to pH 7.2 with sodium phosphate salts. The vesicles were dispersed in 489 mM KNO<sub>3</sub> buffered to pH 7.2 with 5 mM sodium phosphate salts. Each point represents the average of three trials.

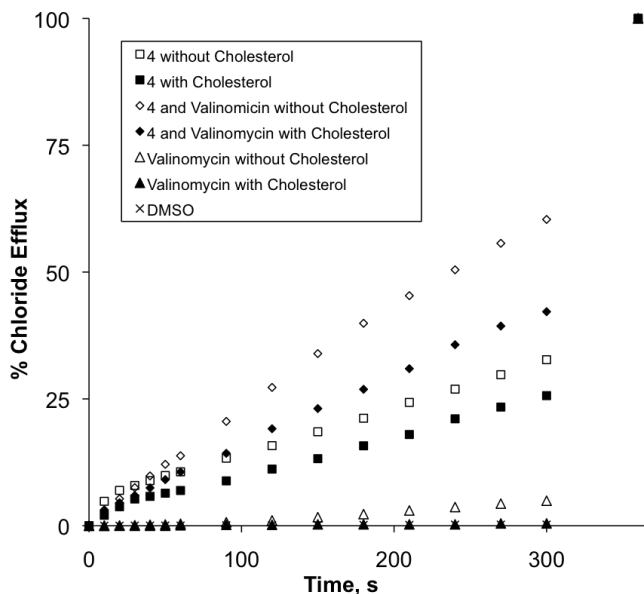

**Fig. S5** Chloride efflux promoted by 0.02 molar equiv. of receptor **4** in the presence and absence of valinomycin (0.02 molar equiv.) from unilamellar POPC vesicles and unilamellar POPC/cholesterol (7:3) vesicles, loaded with 489 mM KCl buffered to pH 7.2 with sodium phosphate salts. The vesicles were dispersed in 489 mM KNO<sub>3</sub> buffered to pH 7.2 with 5 mM sodium phosphate salts. Each point represents the average of three trials.

### Proton NMR studies

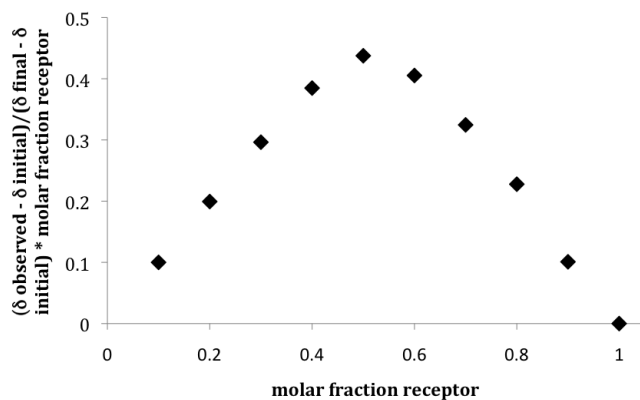

**Fig. S6** Job plots in DMSO-*d*<sub>6</sub> /0.5% H<sub>2</sub>O for compound **1** with TBA<sub>2</sub>·SO<sub>4</sub>, NH at 8.9 ppm.

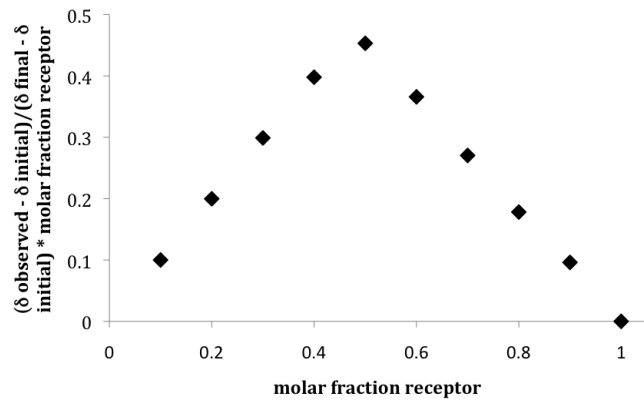

**Fig. S7** Job plots in DMSO- $d_6$  /0.5% H<sub>2</sub>O for compound **2** with TBA<sub>2</sub>·SO<sub>4</sub>, NH at 7.5 ppm.

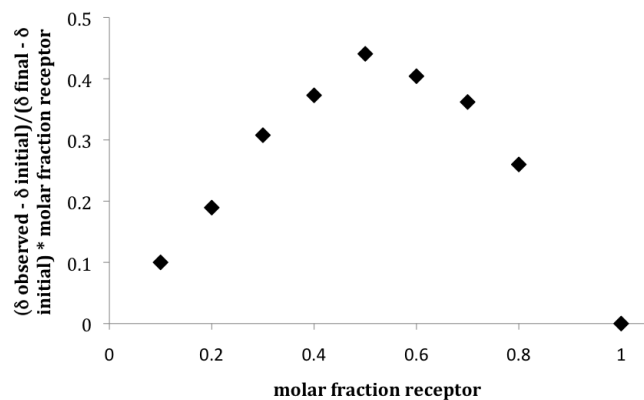

**Fig. S8** Job plots in DMSO- $d_6$  /0.5% H<sub>2</sub>O for compound **3** with TBA<sub>2</sub>·SO<sub>4</sub>, NH at 7.1 ppm.

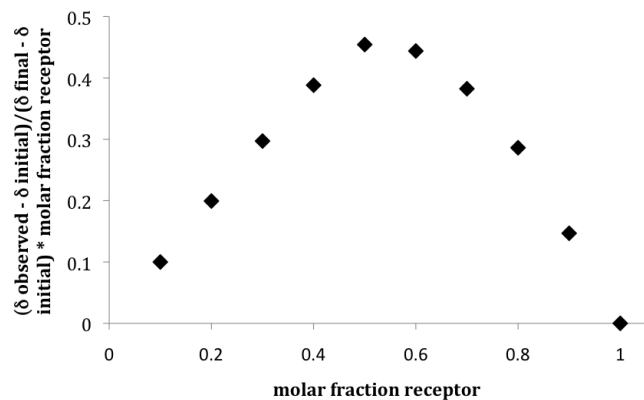

**Fig. S9** Job plots in DMSO- $d_6$  /0.5% H<sub>2</sub>O for compound **4** with TBA<sub>2</sub>·SO<sub>4</sub>, NH at 7.7 ppm.



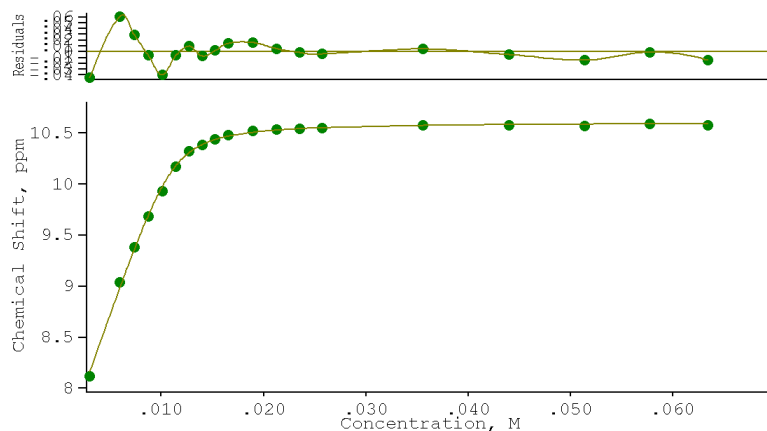

**Fig. S10**  $^1\text{H}$  NMR titration in  $\text{DMSO-}d_6/\text{H}_2\text{O}$  0.5% for compound **1** with  $\text{TBA}_2\cdot\text{SO}_4$ , Changes in chemical shift are fitted to a 1:1 binding model, NH at 7.34 ppm,  $K_a = 3890 \text{ M}^{-1}$  error = 8 %.

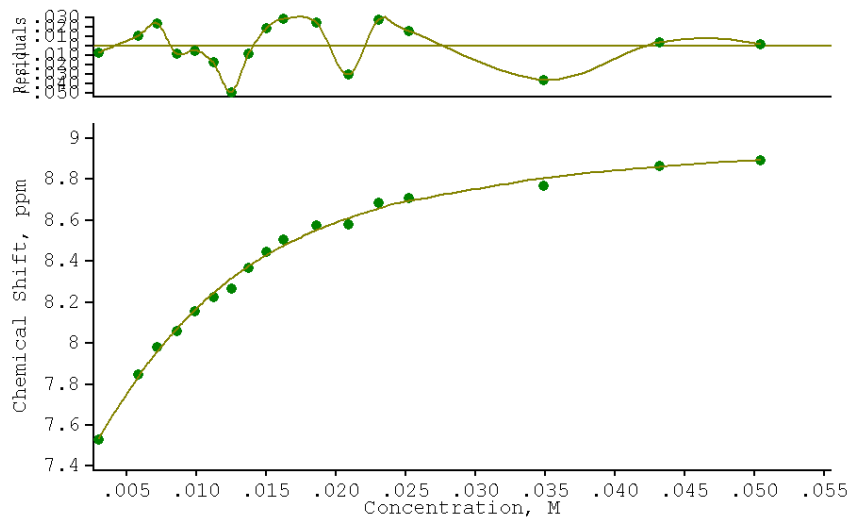

**Fig. S11**  $^1\text{H}$  NMR titration in  $\text{DMSO-}d_6/\text{H}_2\text{O}$  0.5% for compound **1** with  $\text{TBA}\cdot\text{H}_2\text{PO}_4$ , Changes in chemical shift are fitted to a 1:1 binding model, NH at 7.34 ppm,  $K_a = 236 \text{ M}^{-1}$  error = 10 %.

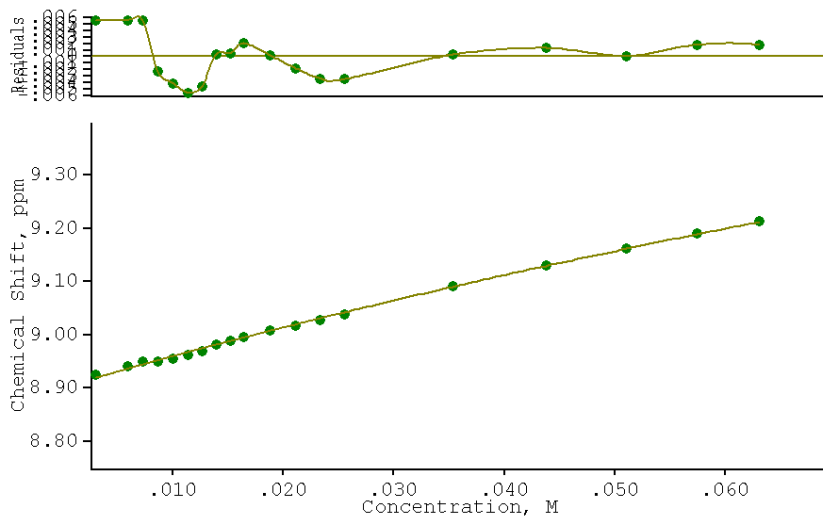

**Fig. S12**  $^1\text{H}$  NMR titration in  $\text{DMSO-}d_6/\text{H}_2\text{O}$  0.5% for compound **1** with  $\text{TBA}\cdot\text{Cl}$ , Changes in chemical shift are fitted to a 1:1 binding model, NH at 8.90 ppm,  $K_a < 10 \text{ M}^{-1}$ .

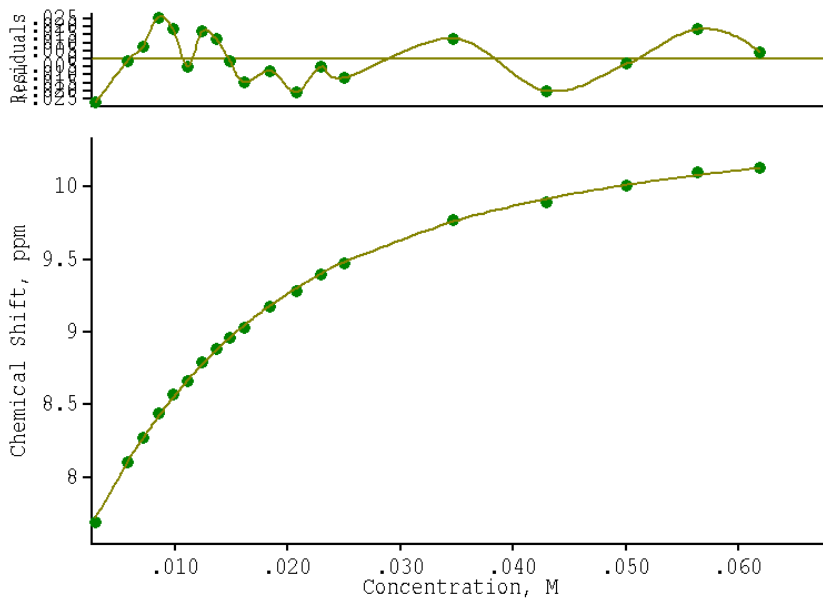

**Fig. S13**  $^1\text{H}$  NMR titration in  $\text{DMSO-}d_6/\text{H}_2\text{O}$  0.5% for compound **1** with  $\text{TBA}\cdot\text{PhCOO}$ , Changes in chemical shift are fitted to a 1:1 binding model, NH at 7.18 ppm,  $K_a = 106 \text{ M}^{-1}$  error = 3 %.

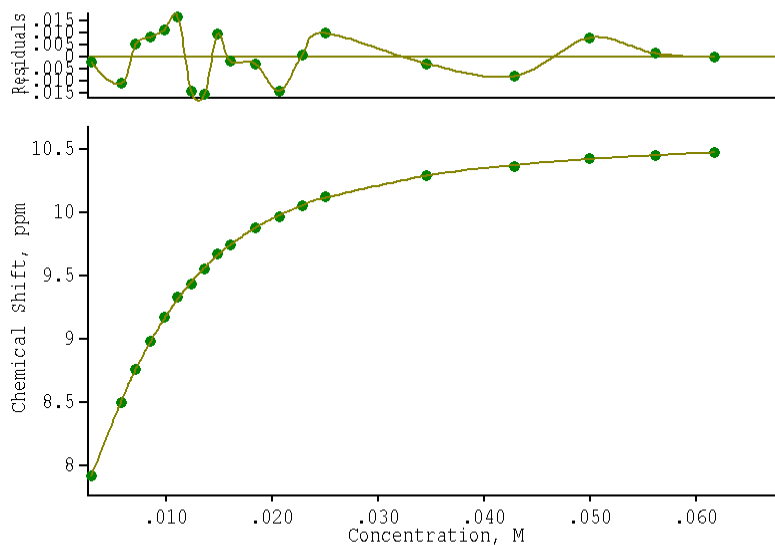

**Fig. S14**  $^1\text{H}$  NMR titration in  $\text{DMSO-}d_6/\text{H}_2\text{O}$  0.5% for compound **1** with  $\text{TBA}\cdot\text{CH}_3\text{COO}$ , Changes in chemical shift are fitted to a 1:1 binding model, NH at 7.18 ppm,  $K_a = 324 \text{ M}^{-1}$  error = 2 %.

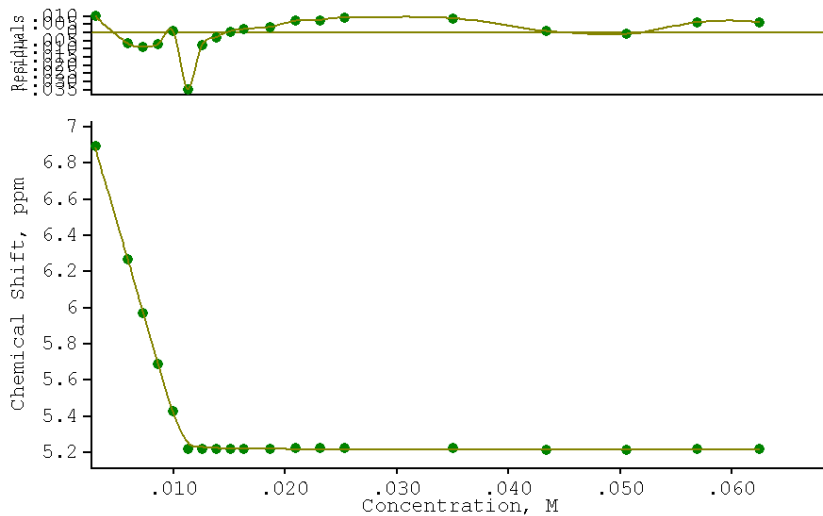

**Fig. S15**  $^1\text{H}$  NMR titration in  $\text{DMSO-}d_6/\text{H}_2\text{O}$  0.5% for compound **2** with  $\text{TBA}_2\cdot\text{SO}_4$ , Changes in chemical shift are fitted to a 1:1 binding model, NH at 7.50 ppm,  $K_a = > 10000 \text{ M}^{-1}$ .

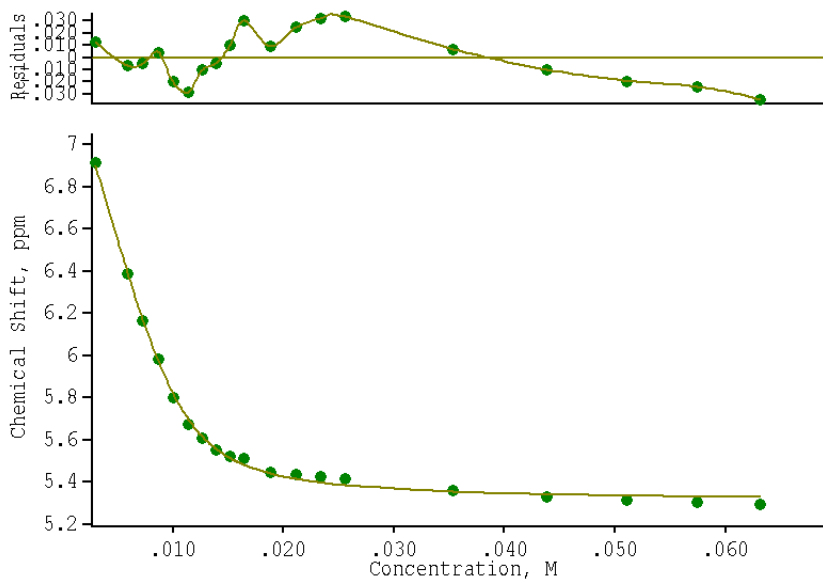

**Fig. S16**  $^1\text{H}$  NMR titration in  $\text{DMSO-}d_6/\text{H}_2\text{O}$  0.5% for compound **2** with  $\text{TBA}\cdot\text{CH}_3\text{COO}$ , Changes in chemical shift are fitted to a 1:1 binding model, NH at 7.50 ppm,  $K_a = 1713 \text{ M}^{-1}$  error = 8 %.

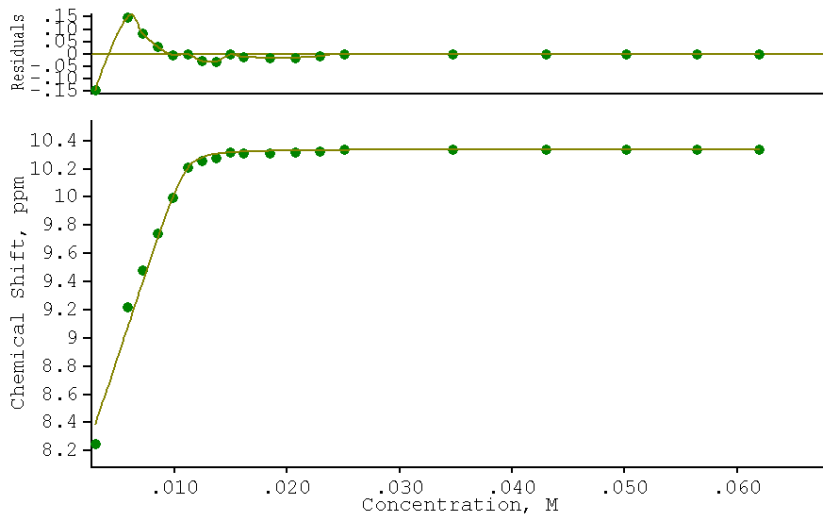

**Fig. S17**  $^1\text{H}$  NMR titration in  $\text{DMSO-}d_6/\text{H}_2\text{O}$  0.5% for compound **3** with  $\text{TBA}_2\cdot\text{SO}_4$ , Changes in chemical shift are fitted to a 1:1 binding model, NH at 7.07 ppm,  $K_a = > 10000 \text{ M}^{-1}$ .

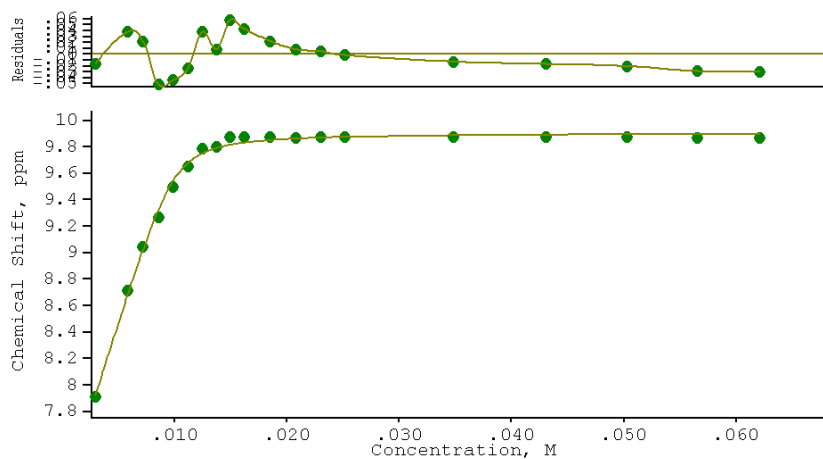

**Fig. S18**  $^1\text{H}$  NMR titration in  $\text{DMSO-}d_6/\text{H}_2\text{O}$  0.5% for compound **3** with  $\text{TBA}\cdot\text{H}_2\text{PO}_4$ , Changes in chemical shift are fitted to a 1:1 binding model, NH at 7.07 ppm,  $K_a = 5548 \text{ M}^{-1}$  error = 15 %.

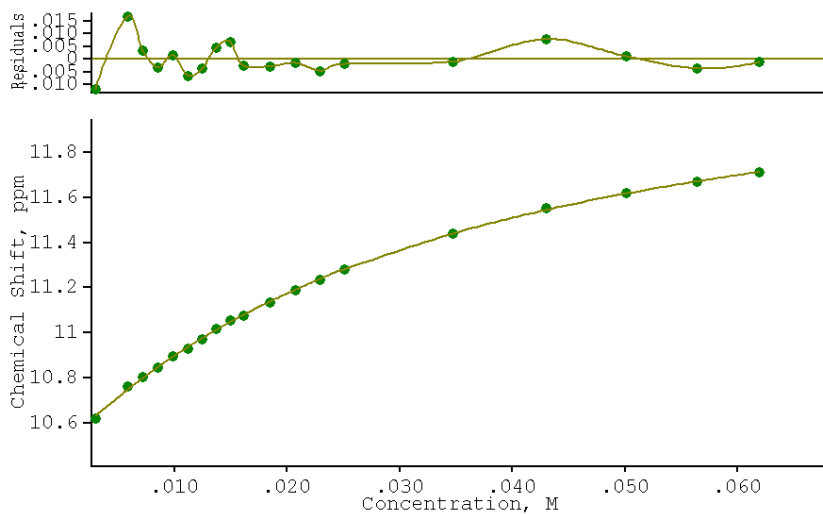

**Fig. S19**  $^1\text{H}$  NMR titration in  $\text{DMSO-}d_6/\text{H}_2\text{O}$  0.5% for compound **3** with  $\text{TBA}\cdot\text{Cl}$ , Changes in chemical shift are fitted to a 1:1 binding model, NH at 10.49 ppm,  $K_a = 36 \text{ M}^{-1}$  error = 4 %.

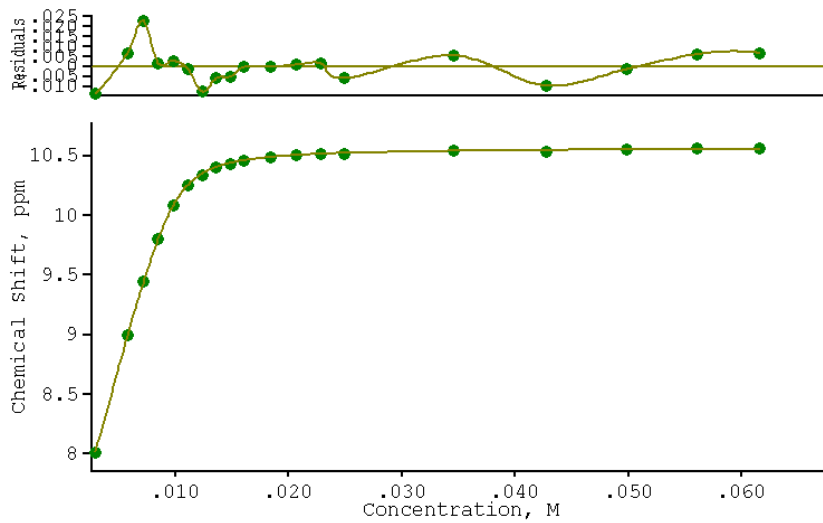

**Fig. S20**  $^1\text{H}$  NMR titration in  $\text{DMSO-}d_6/\text{H}_2\text{O}$  0.5% for compound **3** with  $\text{TBA}\cdot\text{PhCOO}$ , Changes in chemical shift are fitted to a 1:1 binding model, NH at 7.07 ppm,  $K_a = 5034 \text{ M}^{-1}$  error = 3 %.

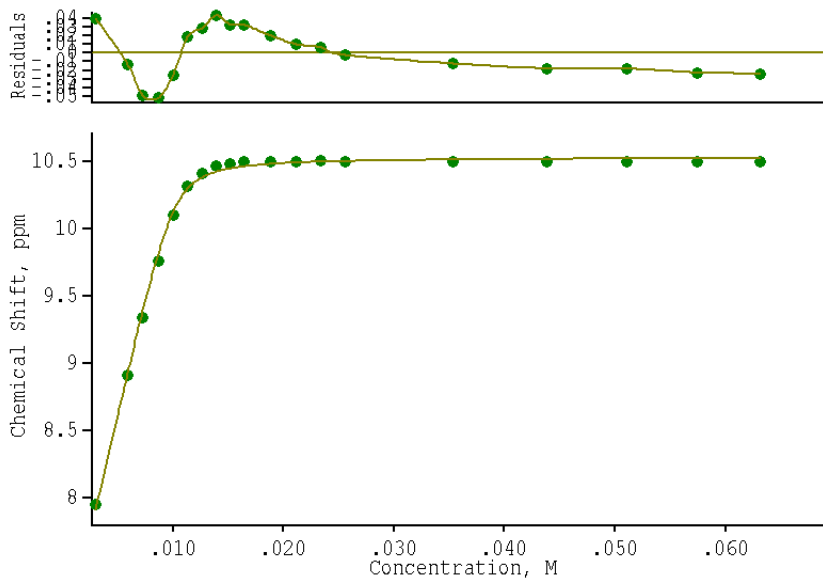

**Fig. S21**  $^1\text{H}$  NMR titration in  $\text{DMSO-}d_6/\text{H}_2\text{O}$  0.5% for compound **3** with  $\text{TBA}\cdot\text{CH}_3\text{COO}$ , Changes in chemical shift are fitted to a 1:1 binding model, NH at 7.08 ppm,  $K_a = 8146 \text{ M}^{-1}$  error = 13 %.

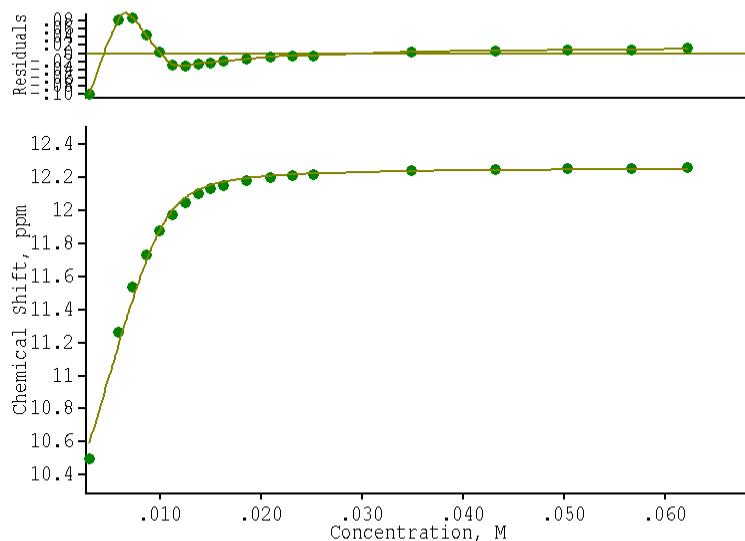

**Fig. S22**  $^1\text{H}$  NMR titration in  $\text{DMSO-}d_6/\text{H}_2\text{O}$  0.5% for compound **4** with  $\text{TBA}_2\cdot\text{SO}_4$ , Changes in chemical shift are fitted to a 1:1 binding model, NH at 9.44 ppm,  $K_a = 4071 \text{ M}^{-1}$  error = 20 %.

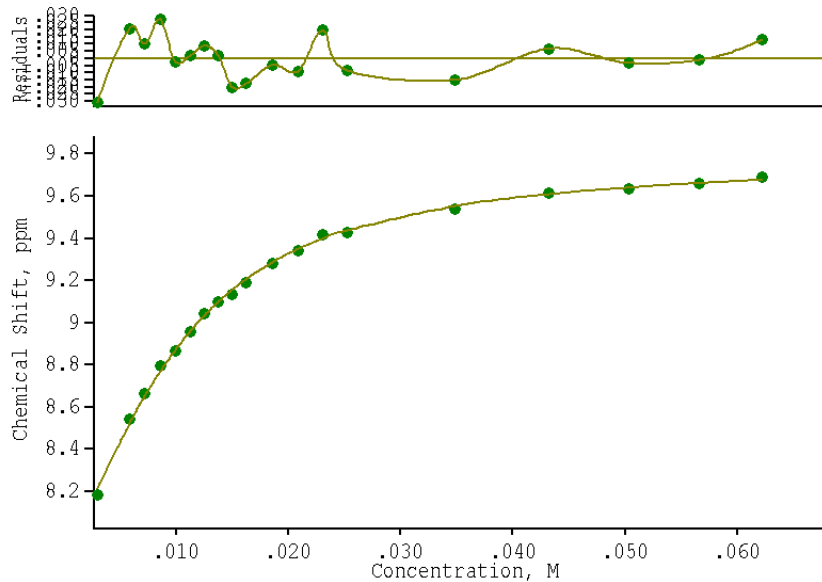

**Fig. S23**  $^1\text{H}$  NMR titration in  $\text{DMSO-}d_6/\text{H}_2\text{O}$  0.5% for compound **4** with  $\text{TBA}\cdot\text{H}_2\text{PO}_4$ , Changes in chemical shift are fitted to a 1:1 binding model, NH at 7.73 ppm,  $K_a = 264 \text{ M}^{-1}$  error = 5 %.

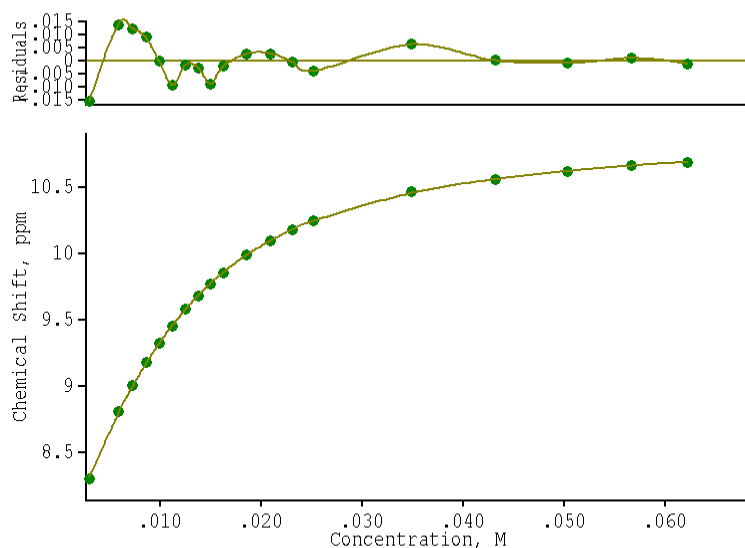

**Fig. S24**  $^1\text{H}$  NMR titration in  $\text{DMSO-}d_6/\text{H}_2\text{O}$  0.5% for compound **4** with  $\text{TBA}\cdot\text{PhCOO}$ , Changes in chemical shift are fitted to a 1:1 binding model, NH at 7.73 ppm,  $K_a = 209 \text{ M}^{-1}$  error = 1 %.

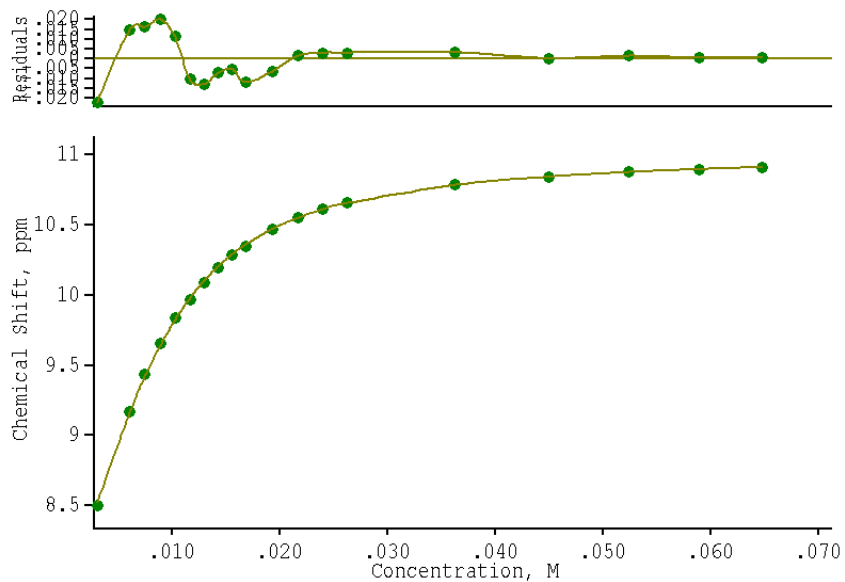

**Fig. S25**  $^1\text{H}$  NMR titration in  $\text{DMSO-}d_6/\text{H}_2\text{O}$  0.5% for compound **4** with  $\text{TBA}\cdot\text{CH}_3\text{COO}$ , Changes in chemical shift are fitted to a 1:1 binding model, NH at 7.73 ppm,  $K_a = 435 \text{ M}^{-1}$  error = 2 %.



## References

1. N. J. Andrews, C. J. E. Haynes, M. E. Light, S. J. Moore, C. C. Tong, J. T. Davis, W. A. Harrell Jr and P. A. Gale, *Chem. Sci.*, 2010, **2**, 256-260.
2. L. Novak, M. Hanania, P. Kovacs, C. E. Kovacs, P. Kolonits and C. Szantay, *Synth. Commun.*, 1999, **29**, 1757-1766.
3. P. de Tullio, S. Boverie, B. Becker, M.-H. Antoine, Q.-A. Nguyen, P. Francotte, S. Counerotte, S. Sebille, B. Pirotte and P. Lebrun, *J. Med. Chem.*, 2005, **48**, 4990-5000.
4. P. de Tullio, B. Pirotte, F. Somers, S. Boverie, F. Lacan and J. Delarge, *Tetrahedron*, 1998, **54**, 4935-4942.
